# Supplementary material for: Antibacterial Activity of Boswellia sacra Flueck. Oleoresin Extract against Porphyromonas gingivalis Periodontal Pathogen
Source: MDPI journal article supplement (doi:10.3390/antibiotics10070859), 2021-07-15
Supplement: s1 [file s1]

## Supporting Materials

# Antibacterial Activity of *Boswellia sacra* Flueck. Oleoresin Extract against *Porphyromonas gingivalis* Periodontal Pathogen

Nashwah G. M. Attallah <sup>1,2,†</sup>, Walaa A. Negm <sup>3,\*†</sup>, Engy Elekhawwy <sup>4,\*</sup>, Najla Altwaijry <sup>1</sup>, Elshaymaa I. Elmongy <sup>1,5,\*</sup>, Thanaa A. El-Masry <sup>6</sup>, Eman A. Alturki <sup>7</sup>, Doaa A. Yousef <sup>8</sup> and Malak Y. Shoukheba <sup>8</sup>

<sup>1</sup> Pharmaceutical Sciences Department, College of Pharmacy, Princess Nourah bint Abdulrahman University, 84428 Riyadh, Saudi Arabia; ngmohamed@pnu.edu.sa (N.G.M.A.); naaltwaijry@pnu.edu.sa (N.A.)

<sup>2</sup> Egyptian Drug Authority (EDA), 8655 Giza, Egypt (previously NODCAR)

<sup>3</sup> Pharmacognosy Department, Faculty of Pharmacy, Tanta University, 31527 Tanta, Egypt

<sup>4</sup> Pharmaceutical Microbiology Department, Faculty of Pharmacy, Tanta University, 31527 Tanta, Egypt

<sup>5</sup> Pharmaceutical Chemistry Department, Faculty of Pharmacy, Helwan University, 11795 Helwan, Egypt

<sup>6</sup> Pharmacology Department, Faculty of Pharmacy, Tanta University, 31527 Tanta, Egypt; thanaa.elmasri@pharm.tanta.edu.eg (T.A.E.-M)

<sup>7</sup> Pharmacognosy Department, College of Pharmacy, King Saud University, 84428 Riyadh, Saudi Arabia; emalturki@ksu.edu.sa

<sup>8</sup> Oral Medicine, Periodontology, Oral Diagnosis, and Radiology Department, Faculty of Dentistry, Tanta University, 31527 Tanta, Egypt; doaa.bayoumi@dent.tanta.edu.eg (D.A.Y.); malak.mohamed@dent.tanta.edu.eg (M.Y.S.)

\* Correspondence: walaa.negm@pharm.tanta.edu.eg (W.A.N.); engy.ali@pharm.tanta.edu.eg (E.E.); eielmongy@pnu.edu.sa (E.I.E.)

† These authors contributed equally to this work.

**Table S1:** Sequences of the oligonucleotides used in qRT-PCR.

| Gene        | Direction* | Sequence                         |
|-------------|------------|----------------------------------|
| 16S rRNA    | F          | 5'-TGTAGATGACTGATGGTGAAA-3'      |
|             | R          | 5' -ACTGTTAGCAACTACCGATGT-3'     |
| <i>fimA</i> | F          | 5'-CAGCAGGAAGCCATCAAATC-3'       |
|             | R          | 5' -CAGTCAGTTCAGTTGTCAAT-3'      |
| <i>hagA</i> | F          | 5'-ACAGCATCAGCCGATATTCC-3'       |
|             | R          | 5'-CGAATTCATTGCCACCTTCT-3'       |
| <i>hagB</i> | F          | 5'-TGTCGCACGGCAAATATCGCTAAAC-3'  |
|             | R          | 5'-CTGGCTGTCCTCGTCGAAAGCATAC-3'  |
| <i>rgpA</i> | F          | 5'-GCCGAGATTGTTCTTGAAGC-3'       |
|             | R          | 5'-AGGAGCAGCAATTGCAAAG-3'        |
| <i>Kgp</i>  | F          | 5'-AGCTGACAAAGGTGGAGACCAAAGG-3'  |
|             | R          | 5'- TGTGGCATGAGTTTTTCGGAACCGT-3' |

\*F: forward, R: reverse

**Table S2:** Age, sex, stage of periodontitis of the selected patient

| <b>Patient number</b> | <b>Age</b> | <b>Sex</b> | <b>Stage of periodontitis</b> |
|-----------------------|------------|------------|-------------------------------|
| 1                     | 30         | Male       | Stage III grade B             |
| 2                     | 40         | Female     | Stage III grade B             |
| 3                     | 30         | Male       | Stage III grade B             |
| 4                     | 34         | Male       | Stage III grade B             |
| 5                     | 32         | Male       | Stage III grade B             |
| 6                     | 45         | Female     | Stage III grade B             |
| 7                     | 49         | Female     | Stage III grade B             |
| 8                     | 50         | Male       | Stage III grade B             |
| 9                     | 45         | Female     | Stage III grade B             |
| 10                    | 34         | Female     | Stage III grade A- B          |
| 11                    | 44         | Female     | Stage III grade B-C           |
| 12                    | 42         | female     | Stage III grade B-C           |
| 13                    | 25         | Male       | Stage III grade B             |
| 14                    | 25         | Male       | Stage III grade B             |
| 15                    | 27         | Female     | Stage III grade B             |
| 16                    | 33         | Male       | Stage III grade B             |
| 17                    | 25         | Male       | Stage III grade A-B           |
| 18                    | 39         | Male       | Stage III grade B             |
| 19                    | 45         | Female     | Stage III grade B             |
| 20                    | 46         | Male       | Stage III grade B             |
| 21                    | 47         | Female     | Stage III grade B             |
| 22                    | 45         | Female     | Stage III grade B             |
| 23                    | 40         | Male       | Stage III grade B             |
| 24                    | 24         | Male       | Stage III grade B             |
| 25                    | 38         | Female     | Stage III grade B             |
| 26                    | 42         | Female     | Stage III grade B             |
| 27                    | 46         | Male       | Stage III grade B             |
| 28                    | 30         | male       | Stage III grade B             |
| 29                    | 33         | female     | Stage III grade B             |
| 30                    | 29         | male       | Stage III grade B             |

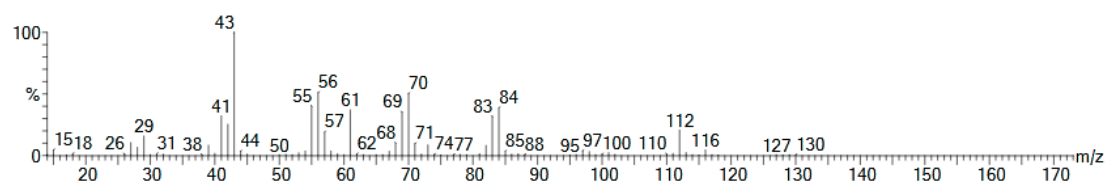

**Figure S1** Mass fragmentation pattern of acetic acid, octyl ester

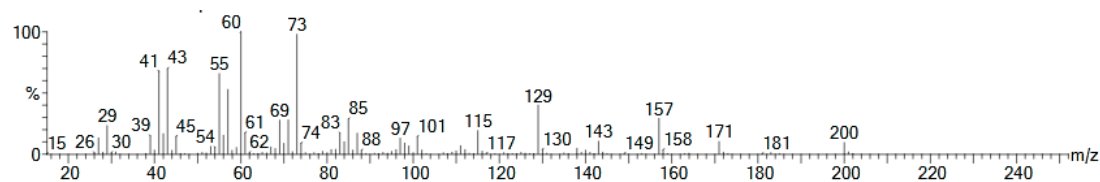

**Figure S2** Mass fragmentation pattern of dodecanoic acid

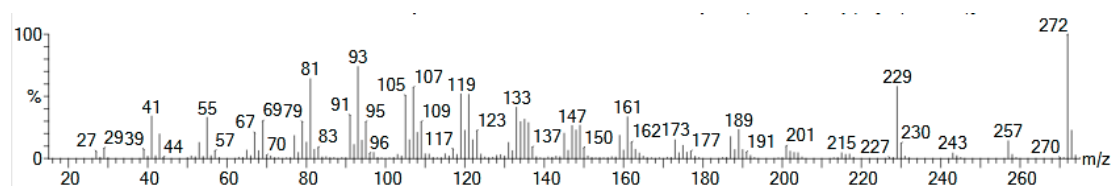

**Figure S3** Mass fragmentation pattern of 3,6,10-cyclotetradecatetraene, 3,7,11-trimethyl-14-(1-methylethyl)-, [S-(E,Z,E,E)]

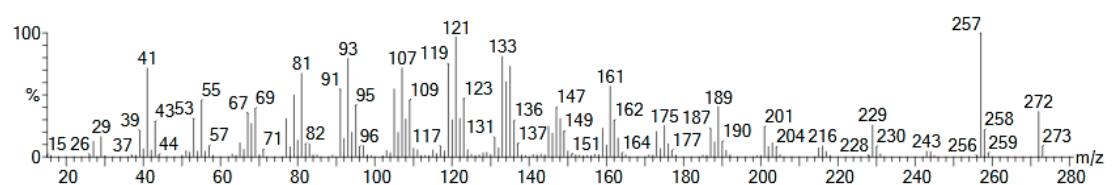

**Figure S4** Mass fragmentation pattern of Bicyclo [9.3.1] pentadeca-3,7-dien-12-ol, 4,8,12,15,15-pentamethyl-, [1R-(1R\*,3E,7E,11R\*,12R\*)]

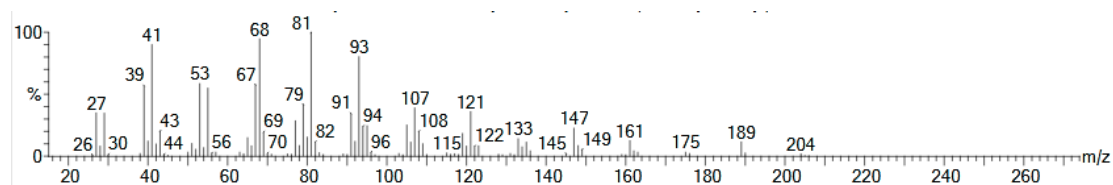

**Figure S5** Mass fragmentation pattern of cyclohexane, 1-ethenyl-1-methyl-2,4-bis(1-methylethenyl)

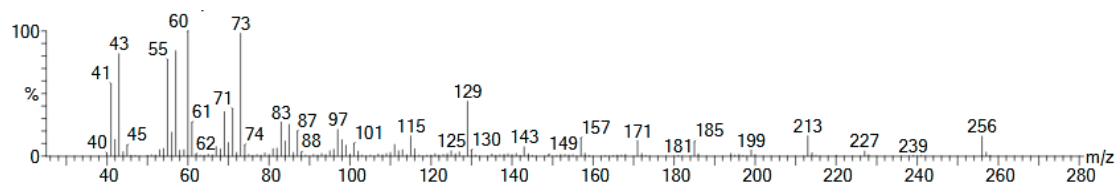

**Figure S6** Mass fragmentation pattern of n-hexadecanoic acid

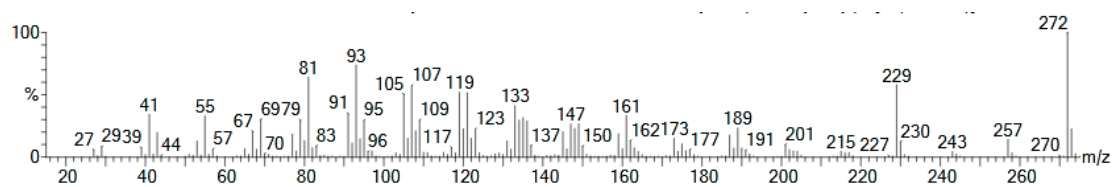

**Figure S7** Mass fragmentation pattern of 1,6,10,14-hexadecatetraen-3-ol, 3,7,11,15-tetramethyl-, (E, E)

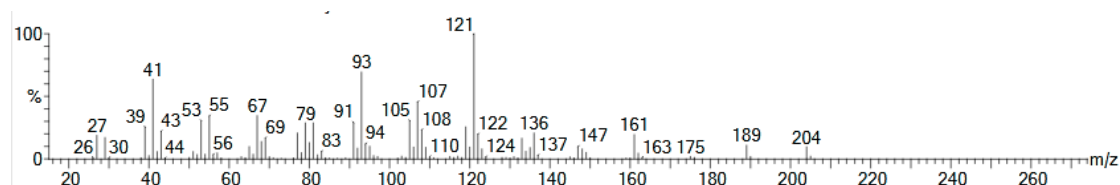

**Figure S8** Mass fragmentation pattern of ζ-elemene

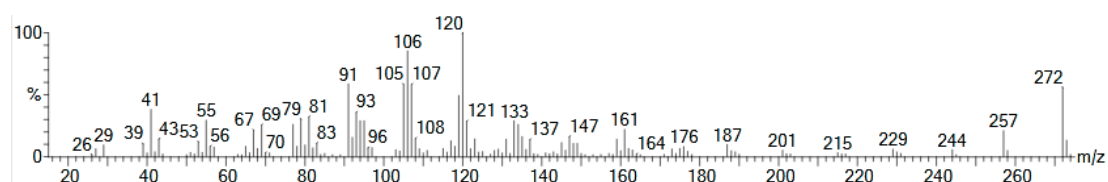

**Figure S9** Mass fragmentation pattern of kaur-16-ene

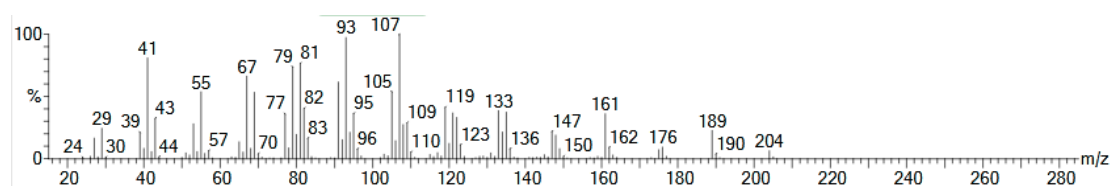

**Figure S10** Mass fragmentation pattern of cycloheptane, 4-methylene-1-methyl-2-(2-methyl-1-propen-1-yl)-1-vinyl-

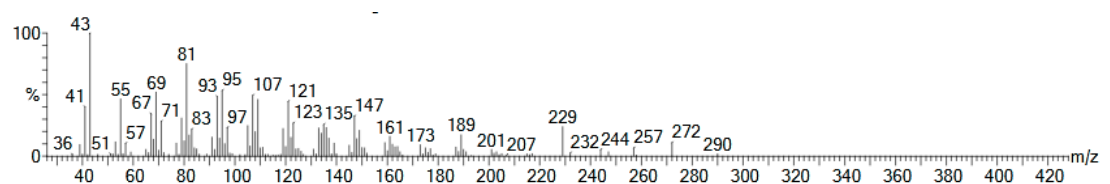

**Figure S11** Mass fragmentation pattern of thunbergol

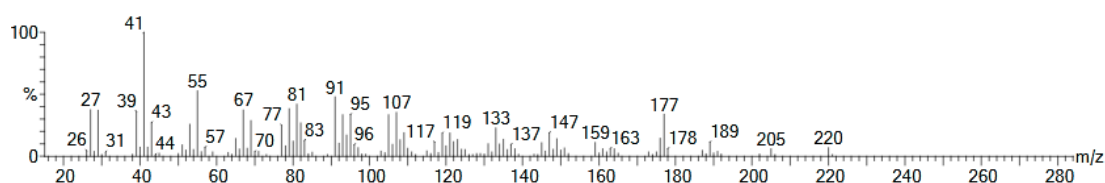

**Figure S12** Mass fragmentation pattern of aromadendrene oxide-(2)

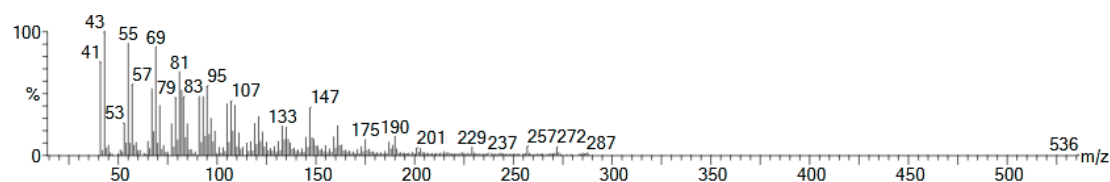

**Figure S13** Mass fragmentation pattern of 1-Heptatriacotanol

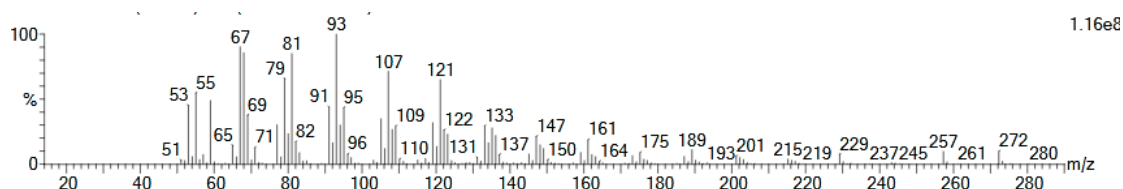

**Figure S14** Mass fragmentation pattern of 2,6,10,14-Hexadecatetraen-1-ol, 3,7,11,15-tetramethyl-, acetate, (E,E,E)-

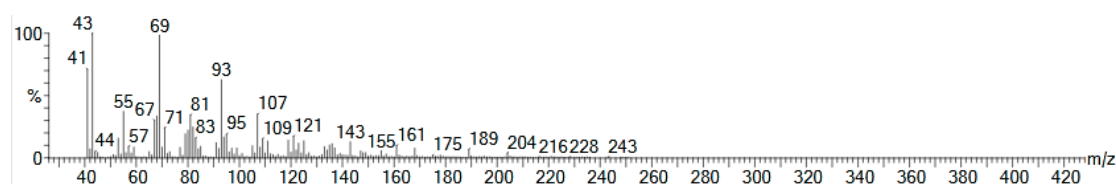

**Figure S15** Mass fragmentation pattern of *trans*-Nerolidyl formate

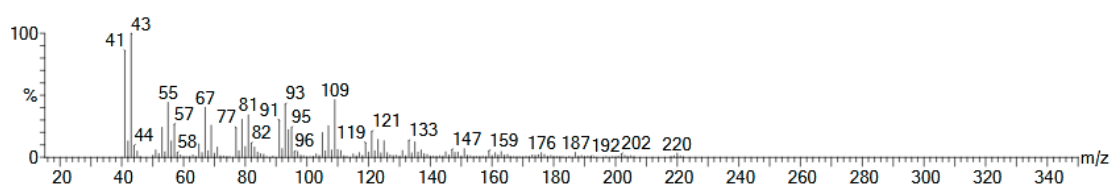

**Figure S16** Mass fragmentation pattern of *cis*-Z- $\alpha$ -Bisabolene epoxide

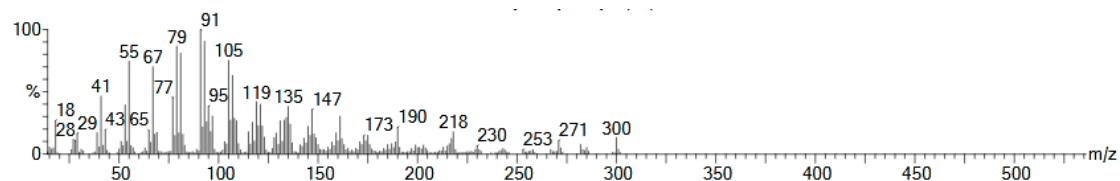

**Figure S17** Mass fragmentation pattern of androstan-17-one, 3-ethyl-3-hydroxy-, (5 $\alpha$ )-

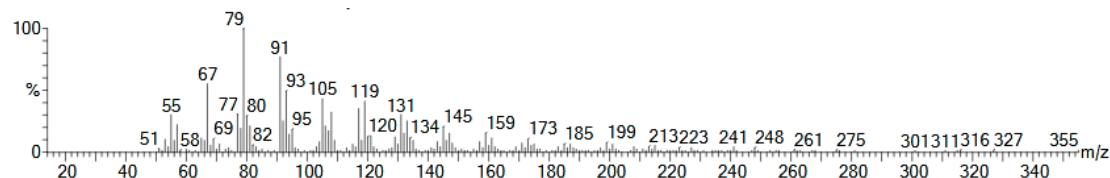

**Figure S18** Mass fragmentation pattern of butyl 4,7,10,13,16,19-docosaheptaenoate

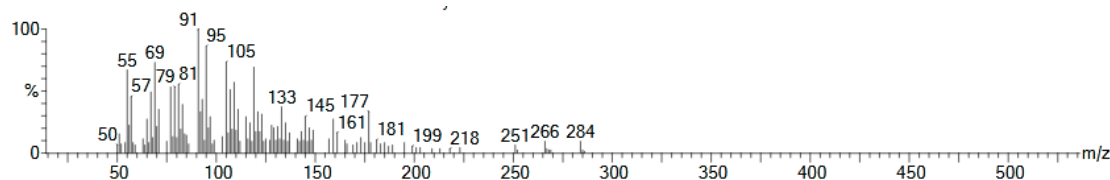

**Figure S19** Mass fragmentation pattern of Vitamin A aldehyde

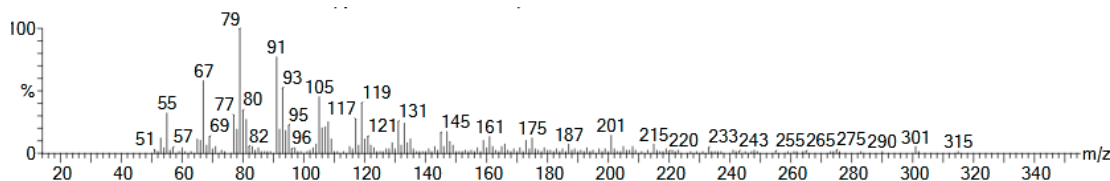

**Figure S20** Mass fragmentation pattern of *i*-propyl 5,8,11,14,17-eicosapentaenoate

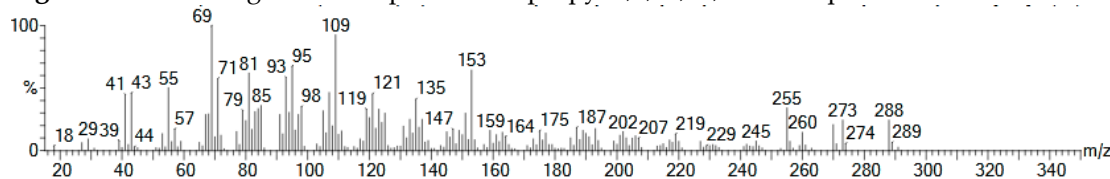

**Figure S21** Mass fragmentation pattern of 1-Naphthalenepropanol, à-ethenyldecahydro-2-hydroxy-à,2,5,5,8a-pentamethyl-, [1R-[1à(R\*),2á,4aa,8aa]]-

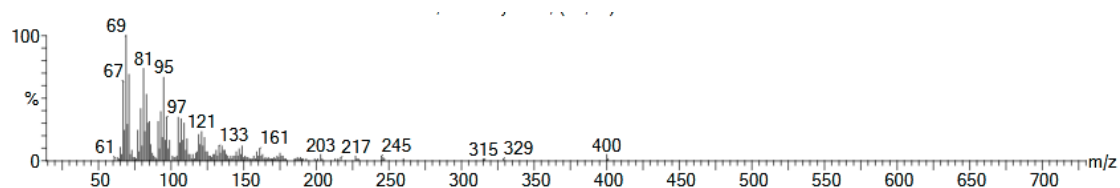

**Figure S22** Mass fragmentation pattern of Cholestan-3-ol, 2-methylene-, (3á,5à)-

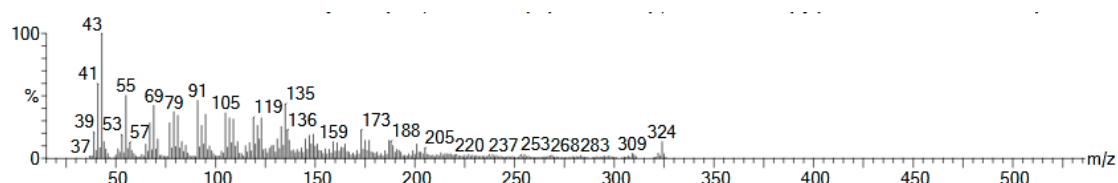

**Figure S23** Mass fragmentation pattern of 2-[4-methyl-6-(2,6,6-trimethylcyclohex-1-enyl) hexa-1,3,5-trienyl] cyclohex-1-en-1-carboxaldehyde

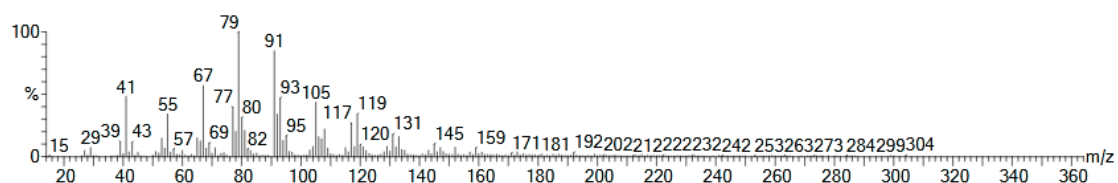

**Figure S24** Mass fragmentation pattern of docosahexaenoic acid

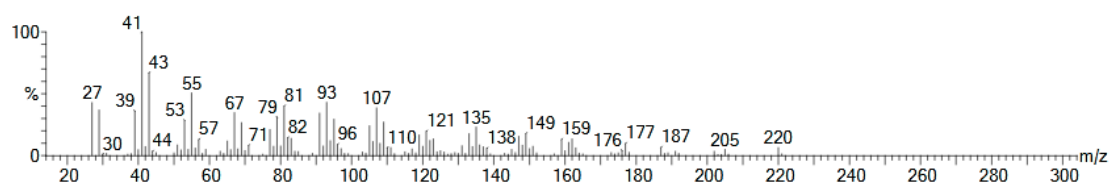

**Figure S 25** Mass fragmentation pattern of isoaromadendrene epoxide

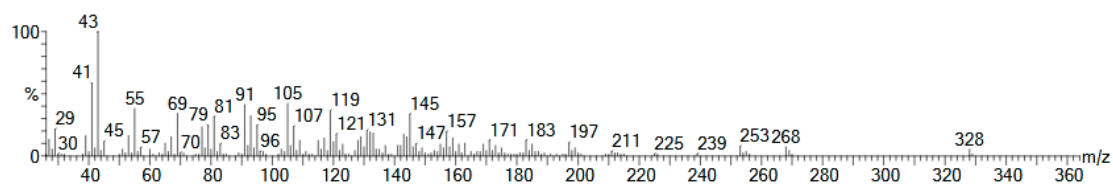

**Figure S26** Mass fragmentation pattern of retinol, acetate

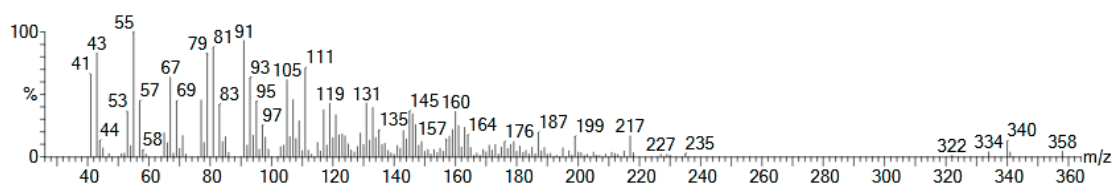



**Figure S27** Mass fragmentation pattern of card-20(22)-enolide, 3,5,14,19-tetrahydroxy-, (3 $\alpha$ ,5 $\alpha$ )-

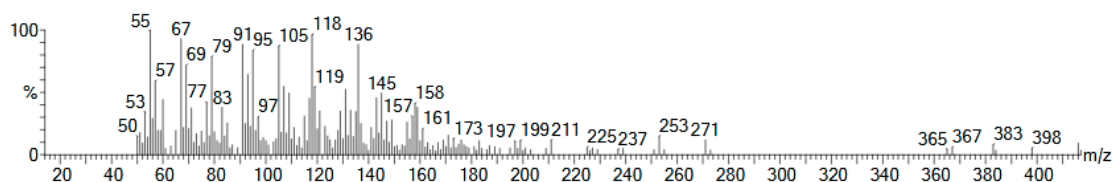

**Figure S28** Mass fragmentation pattern of 9,10-secocholesta-5,7,10(19)-triene-3,25,26-triol, (3 $\alpha$ ,5 $\alpha$ ,7 $\alpha$ )-

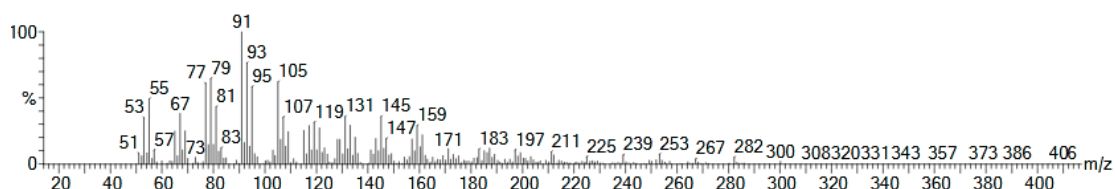

**Figure S29** Mass fragmentation pattern of 3-oxatricyclo [20.8.0.0(7,16)] triaconta-1(22),7(16), 9,13,23,29-hexaene

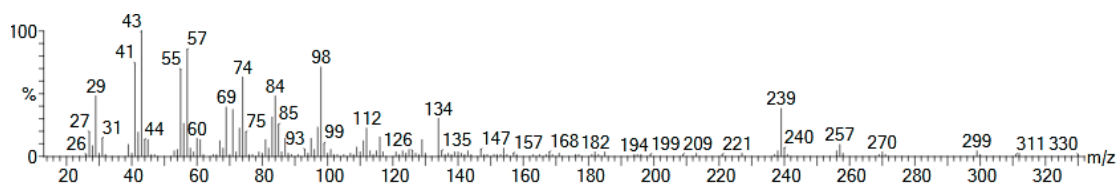

**Figure S30** Mass fragmentation pattern of hexadecanoic acid, 2-hydroxy-1-(hydroxymethyl)ethyl ester

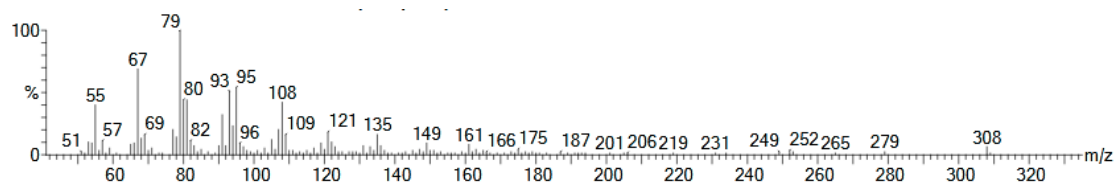

**Figure S31** Mass fragmentation pattern of methyl 2-hydroxy-octadeca-9,12,15-trienoate

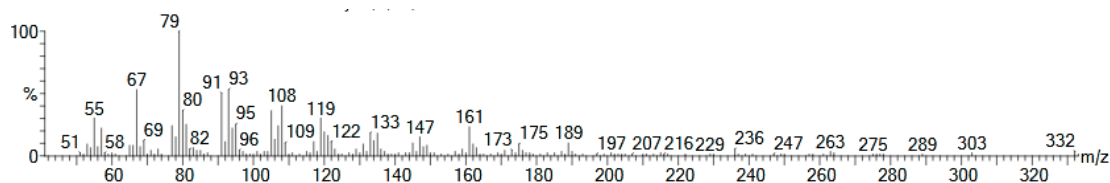

**Figure S32** Mass fragmentation pattern of butyl 6,9,12,15-octadecatetraenoate

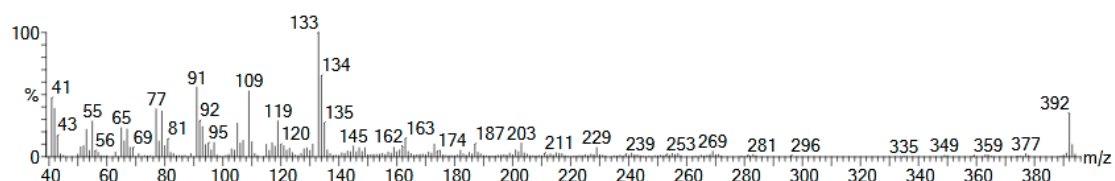

**Figure S33** Mass fragmentation pattern of 2H-cyclopenta[a]phenanthrene-3,17-dione, 16-(1,3-dimethyl-1H-pyrazol-4-ylmethylene)-10,13-dimethyl-1,6,7,8,9,10,11,12,13,14,15,16-dodecahydro-

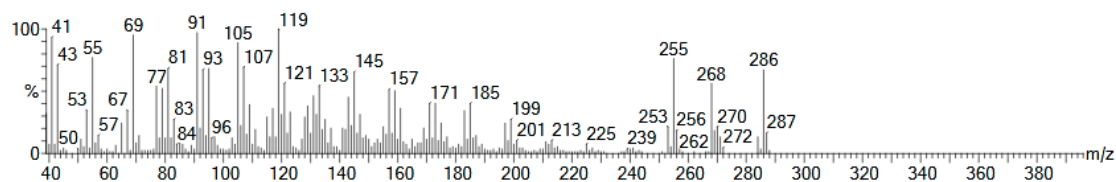

**Figure S34** Mass fragmentation pattern of retinol

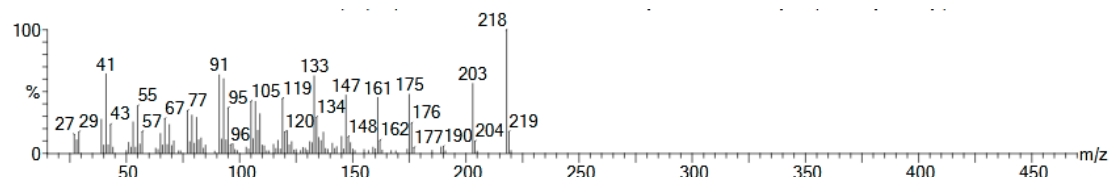

**Figure S35** Mass fragmentation pattern of 2(1H) Naphthalenone, 3,5,6,7,8,8a-hexahydro-4,8a-dimethyl-6-(1-methylethenyl)-

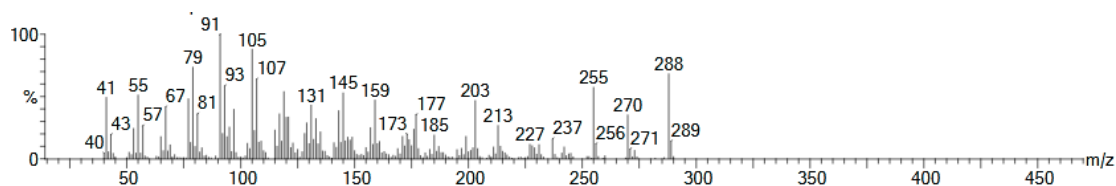

**Figure S36** Mass fragmentation pattern of prasterone

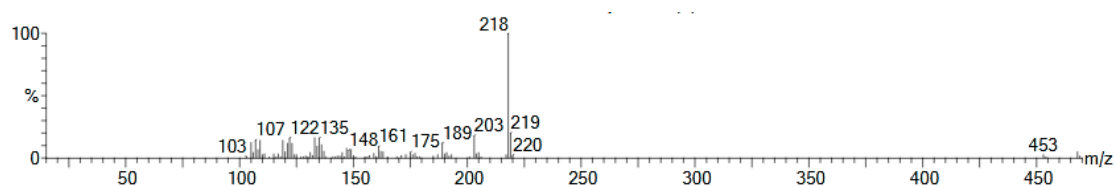

**Figure S37** Mass fragmentation pattern of urs-12-en-24-oic acid, 3-oxo-, methyl ester, (+)-7

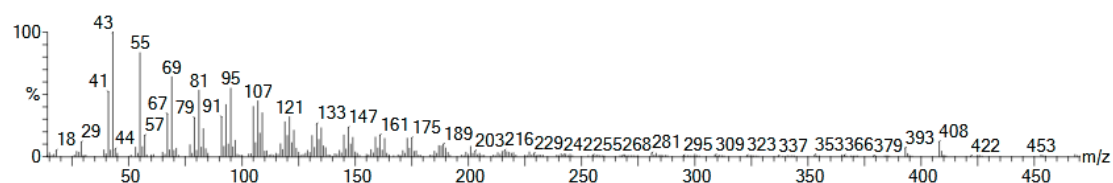

**Figure S38** Mass fragmentation pattern of 9,19-cycloergost-24(28)-en-3-ol, 4,14-dimethyl-, acetate, (3 $\alpha$ ,4 $\alpha$ )

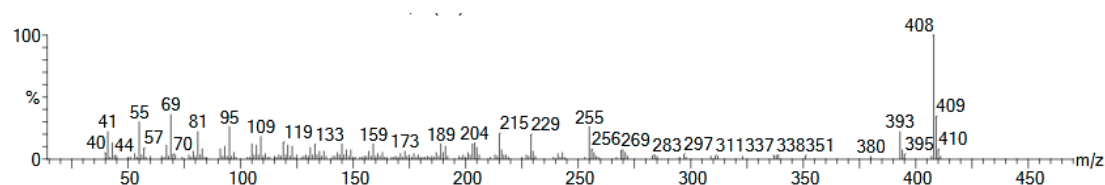

**Figure S39** Mass fragmentation pattern of oleana-11,13(18)-diene

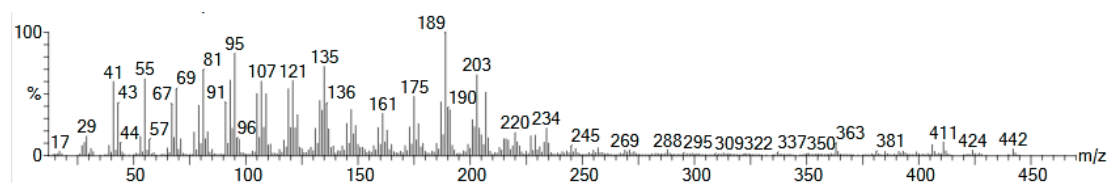

**Figure S40** Mass fragmentation pattern of betulin

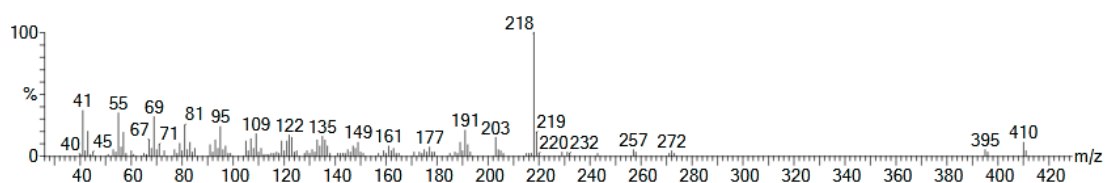

**Figure S41** Mass fragmentation pattern of urs-12-ene

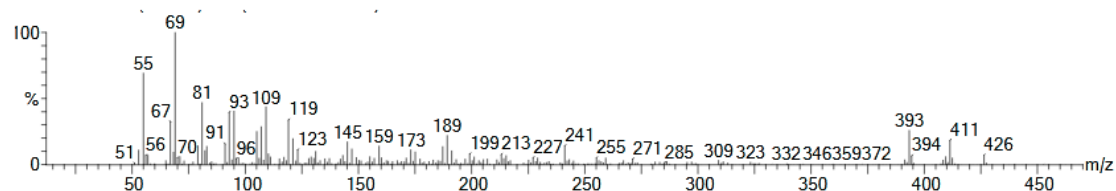

**Figure S42** Mass fragmentation pattern of lanosterol

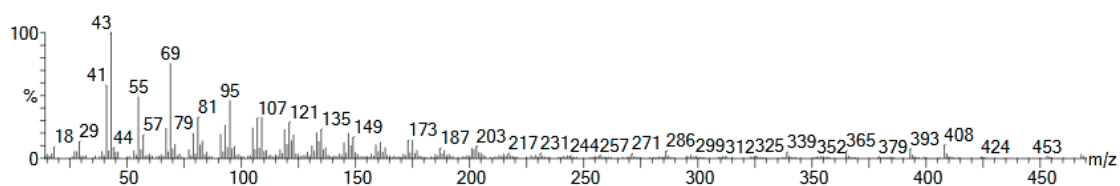

**Figure S43** Mass fragmentation pattern of 9,19-cyclolanost-24-en-3-ol, acetate, (3a)-

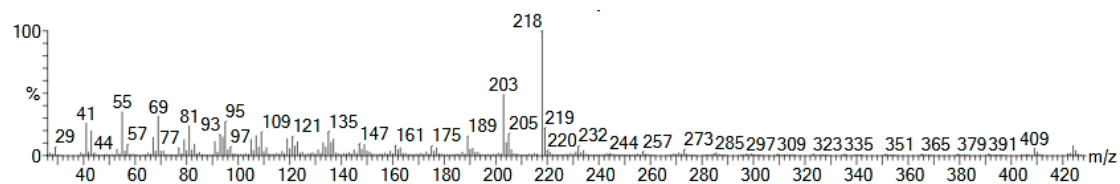

**Figure S44** Mass fragmentation pattern of 4,4,6a,6b,8a,11,11,14b-octamethyl-1,4,4a,5,6,6a,6b,7,8,8a,9,10,11,12,12a,14,14a,14b-octadecahydro-2H-picen-3-one

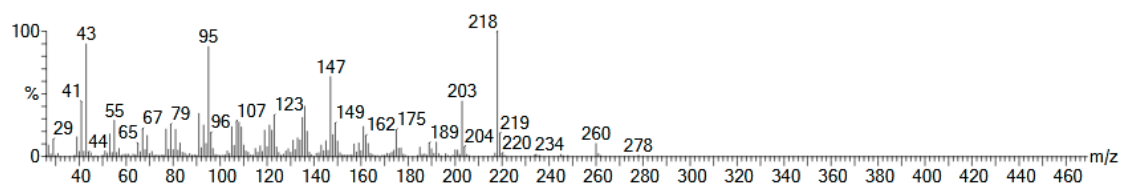

**Figure S45** Mass fragmentation pattern of acetic acid, 3-hydroxy-7-isopropenyl-1,4a-dimethyl-2,3,4,4a,5,6,7,8-octahydronaphthalen-2-yl ester

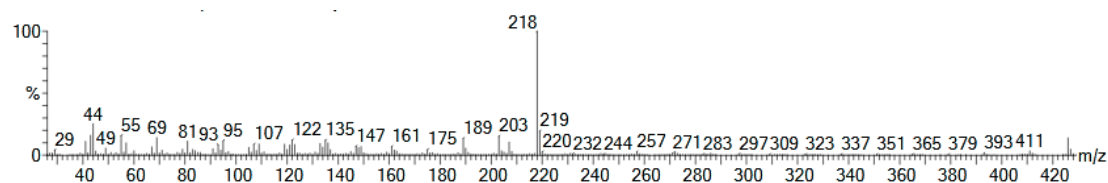

**Figure S46** Mass fragmentation pattern of  $\alpha$ -amyrin

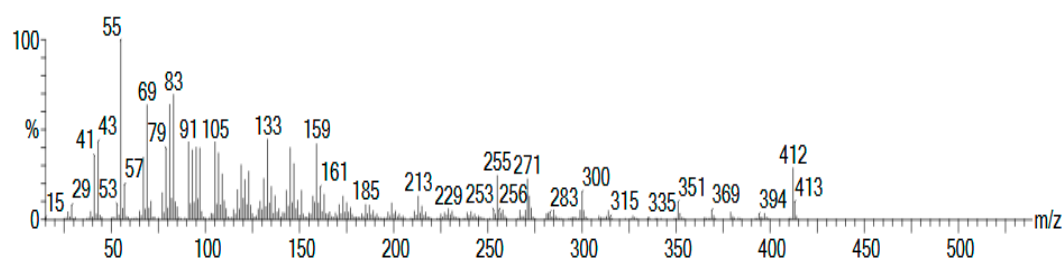

**Figure S47** Mass fragmentation pattern of stigmasterol

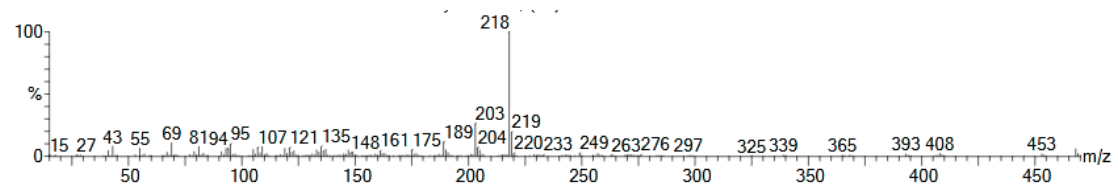

**Figure S48** Mass fragmentation pattern of 2-oleanen-3-yl acetate, (3 $\alpha$ )-

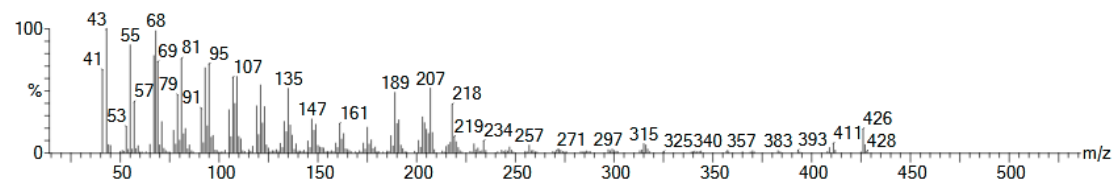

**Figure S49** Mass fragmentation pattern of lupeol

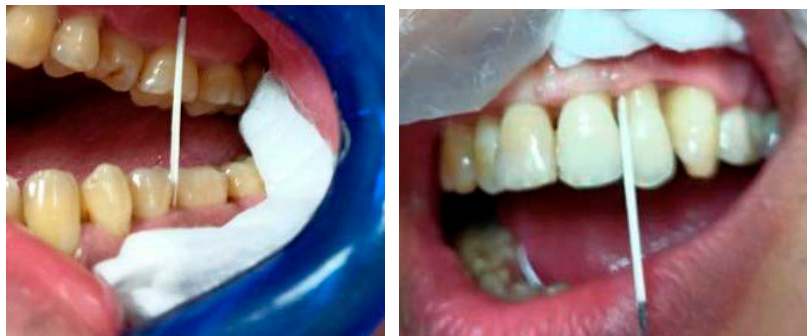

**Figure S50** shows the method of subgingival plaque sample collection using sterile paper points.
